1 **Global phylogenetic analysis of *Escherichia coli* and plasmids carrying**  
2 **the *mcr-1* gene indicates bacterial diversity but plasmid restriction**

3

4

5

6 Sébastien Matamoros<sup>1\*</sup>, Jarne M. van Hattem<sup>1\*</sup>, Maris S. Arcilla<sup>2</sup>, Niels Willems<sup>1</sup>, Damian C. Melles<sup>2</sup>,

7 John Penders<sup>3,4</sup>, Nguyen Vinh Trung<sup>1,5,6</sup>, Ngo Thi Hoa<sup>6,7</sup>, COMBAT consortium†, Menno D. de Jong<sup>1</sup>,

8 Constance Schultz<sup>1,5</sup>

9

10 Department of Medical Microbiology, Academic Medical Center (AMC), Amsterdam, the

11 Netherlands<sup>1</sup>; Department of Medical Microbiology and Infectious Diseases, Erasmus University

12 Medical Center, Rotterdam, the Netherlands<sup>2</sup>; School for Public Health and Primary Care (Caphri),

13 Department of Medical Microbiology, Maastricht University Medical Center (MUMC), Maastricht, the

14 Netherlands<sup>3</sup>; School for Nutrition and Translational Research in Metabolism (NUTRIM), MUMC,

15 Maastricht, the Netherlands<sup>4</sup>; Department of Global Health-Amsterdam Institute for Global Health

16 and Development, AMC, Amsterdam, the Netherlands<sup>5</sup>; Oxford University Clinical Research Unit,

17 Centre for Tropical Medicine, Ho Chi Minh City, Vietnam<sup>6</sup>; Centre for Tropical Medicine, Nuffield

18 Department of Medicine, University of Oxford, Oxford, UK<sup>7</sup>

19

20 \*S.M. and J.M.v.H. contributed equally to this work.

21 \*Address correspondence to Sébastien Matamoros ([s.p.matamoros@amc.nl](mailto:s.p.matamoros@amc.nl))

22 Running title: Phylogenetic analysis of *mcr-1*-carrying *E. coli* isolates

23 †On behalf of the COMBAT consortium: Arcilla MS, Bootsma MC, van Genderen PJ, Goorhuis A,  
24 Grobusch MP, van Hattem JM, de Jong MD, Melles DC, Molhoek N, Oude Lashof AM, Penders J, ,  
25 Schultsz C, Stobberingh EE, Verbrugh HA.

26

27 The COMBAT consortium (in alphabetical order)

28 Maris S. Arcilla<sup>1</sup>, Martin C.J. Bootsma<sup>2</sup>, Perry J. van Genderen<sup>3</sup>, Abraham Goorhuis<sup>4</sup>, Martin  
29 Grobusch<sup>4</sup>, Jarne M. van Hattem<sup>5</sup>, Menno D. de Jong<sup>5</sup>, Damian C. Melles<sup>1</sup>, Nicky Molhoek<sup>6</sup>, Astrid  
30 M.L. Oude Lashof<sup>7</sup>, John Penders<sup>7</sup>, Willemien J.M. van Rooijen<sup>5</sup>, Constance Schultsz<sup>5,8</sup>, Ellen E.  
31 Stobberingh<sup>5</sup>, Henri A. Verbrugh<sup>1</sup>

32 <sup>1</sup> Erasmus University Medical Centre, Department of Medical Microbiology and Infectious Diseases,  
33 Rotterdam,

34 <sup>2</sup> Utrecht University, Department, Faculty of Science, Utrecht,

35 <sup>3</sup> Havenziekenhuis - Institute for Tropical Diseases, Department of Internal Medicine, Rotterdam,

36 <sup>4</sup> Academic Medical Centre, Center of Tropical Medicine and Travel Medicine, Amsterdam,

37 <sup>5</sup> Academic Medical Centre, Department of Medical Microbiology, Amsterdam,

38 <sup>6</sup> Havenziekenhuis - Institute for Tropical Diseases, Travel Clinic, Rotterdam,

39 <sup>7</sup> Maastricht University Medical Centre, School for Nutrition, Toxicology and Metabolism and School  
40 for Public Health and Primary Care, Department of Medical Microbiology, Department of Medical  
41 Microbiology, Maastricht,

42 <sup>8</sup> Academic Medical Centre, Department of Global Health-Amsterdam Institute for Global Health and  
43 the Development, Amsterdam,

44 All in the Netherlands

45

46

## 47 **Abstract**

48 To understand the dynamics behind the worldwide geographical spread of the *mcr-1* gene, we  
49 investigated the population structure and genetic background of 410 Enterobacteriaceae, isolated  
50 from human, animal and environmental samples, and their mobile genetic elements carrying the  
51 *mcr-1* gene.

52 All available whole genome sequences and MLST profiles of *mcr-1*-carrying *E. coli* isolates, along with  
53 6 newly sequenced travel related isolates, were analysed for their phylogenetic relatedness. We  
54 show the presence of two clusters of *mcr-1*-carrying *E. coli* isolates that are possible reservoirs for  
55 the gene that, despite a high overall diversity of the population. One cluster is linked to ST10, a  
56 sequence type known for its ubiquity in human- and food-related environments. No clustering by  
57 geographical origin or isolation source (humans, animal or environment) could be identified.

58 The IncI2, IncX4 and IncHI2 plasmid incompatibility types accounted for more than 90% of 219  
59 mobile genetic elements carrying the *mcr-1* gene. We found significant geographical clustering  
60 consistent with regional spread of IncHI2 plasmids in Europe and IncI2 in Asia.

61 These findings point towards promiscuous spread of the *mcr-1* gene by efficient horizontal gene  
62 transfer dominated by a limited number of plasmid incompatibility types.

## 63 **Keywords**

64 *mcr-1*; *Escherichia coli*; antimicrobial resistance; multilocus sequence typing; whole genome  
65 sequencing; plasmid; phylogeny; colistin; extended spectrum beta-lactamase (ESBL); international  
66 travel; IS*Ap1* transposon element.

## 67 Introduction

68 Antimicrobial resistance (AMR) represents a growing threat to global health <sup>1</sup>. With almost no new  
69 antimicrobial drugs in development <sup>2</sup>, limiting the spread of AMR is key in order to maintain current  
70 treatment options <sup>3</sup>.

71 Colistin is an antibiotic of the polymyxin class, discovered in 1950 and effective against Gram-  
72 negative bacteria <sup>4</sup>. The emergence of multidrug-resistant Gram-negative bacteria, especially those  
73 producing carbapenemases, has reintroduced colistin as a last resort antibiotic for the treatment of  
74 severe infections <sup>5</sup>. In contrast to its limited use in humans, colistin is widely used in food-producing  
75 animals <sup>6</sup>. While colistin resistance was long thought to be caused by chromosomal mutations only <sup>7</sup>,  
76 the emergence of plasmid-mediated resistance, conferred by the *mcr-1* gene, was recently reported  
77 <sup>8</sup>. Since its discovery in China, this gene has been described in several bacterial species that were  
78 isolated from animals, animal food products, humans and environmental samples from around the  
79 world <sup>9-13</sup>. Our previous study in travellers indicated acquisition of *mcr-1* carrying bacteria by healthy  
80 individuals during travel to destinations around the world, potentially related to food exposure, as  
81 well as rapid clearance after return <sup>14</sup>. It has been suggested that *mcr-1* has spread from food animals  
82 to humans <sup>8,15-17</sup>, but there is a lack of comparison of *mcr-1* carrying isolates on a global level to  
83 support this hypothesis.

84 We studied the global population structure as well as the geographic and host distribution of *mcr-1*-  
85 carrying *Escherichia coli*, and mobile genetic elements (MGEs), to establish the population structure  
86 and to assess whether the spread of the *mcr-1* gene is linked to clonal dissemination or transmission  
87 of MGEs from animal, human, or environmental sources within geographic regions.

88

89

## 90 **Results**

### 91 **Literature search**

92 A systematic review of the literature on *mcr-1*, published until 1 January 2017 resulted in the  
93 inclusion of 95 articles, representing a total of 410 entries (whole genome sequences, MLST profiles,  
94 and/or plasmid types) for analysis (See detailed methods and results in Supplementary data,  
95 Supplementary Figure 1 and Supplementary Table 1).

### 96 **Population structure**

#### 97 ***Whole genome sequencing (WGS)***

98 The genomes of 65 *mcr-1*-carrying *E. coli* were analysed, including 6 genomes obtained from *E. coli*  
99 isolated from travellers that were sequenced for the purpose of the present study. Isolates  
100 originated from Asia (n=36; 55.4%), Europe (n=20; 30.8%), North-America (n=4; 6.2%), South-America  
101 (n=4; 6.2%) and Africa (n=1; 1.5%). 45 were of animal origin (69.2%), 19 of human origin (29.2%) and  
102 one strain (1.5%) was isolated from water (Supplementary Table 1).

103 The average size of the genomes of these 65 isolates was 4.9 Mbp, with a median number of genes  
104 identified of 4785 (ranging from 4266 to 7083), representing a pangenome of 23248 genes and a  
105 core genome (defined by genes present in at least 99% of the isolates) of 2216 genes. Bayesian  
106 analysis of the nucleotide alignment of the core genome using the BAPS software<sup>18</sup> revealed the  
107 presence of 5 distinct phylogenetic clusters (Figure 1; Supplementary Figure 2; Supplementary Table  
108 2). The largest cluster (cluster 1) consisted of 26 isolates from 16 different STs (26/65; 40.0%) and the  
109 second cluster of 24 isolates from 15 different STs (36.9%). Clustering was independent of  
110 geographical origin or isolation source (Figure 1) except that all 5 isolates that belong to BAPS cluster  
111 3 are from Europe. Twenty isolates showed less than 10 SNPs/Mbp difference and were considered  
112 clonally related (Supplementary Tables 3 and 4).

#### 113 ***Multilocus sequence typing (MLST)***

114 For 312 *E. coli* isolates originating from 69 studies a MLST profile was published or could be deduced  
115 from the corresponding WGS. Of these, 206 were isolated from animals or animal products (66.0%),  
116 101 were isolated from humans (32.4%), including the 6 travel acquired isolates, and 5 from the  
117 environment (1.6%). 141 Isolates from 25 studies (141/312; 45.2%) originated from Asia and 125  
118 isolates from 25 studies (40.1%) from Europe together accounting for 85.3% of all included isolates.  
119 The isolates represented 112 unique sequence types (STs) with ST10 being most common,  
120 comprising 40/312 (12.8%) isolates originating from Africa, Asia, Europe and South-America.

121

122 eBURST analysis identified three main clusters that clustered around ST10, ST1114 and ST410. The  
123 largest cluster contained all 40 ST10 isolates and an additional 46 isolates in 21 STs that were single  
124 (SLV) or double locus variants (DLV) of ST10 (86/312; 27.6%) (Supplementary Figure 3). The predicted  
125 founder of the second largest cluster was ST1114, a SLV of ST165 and ST100, and included 19 isolates  
126 belonging to 7 different STs (5.4%), while the third cluster was centred on ST410 and included 14  
127 isolates from 3 different STs (4.5%).

128

129 A maximum-likelihood tree based on concatenated MLST gene sequences showed a main clade of  
130 128 isolates, including most, but not all, isolates from the eBURST clusters of ST10 and ST1114  
131 (Supplementary Figure 4A). All isolates from these two eBURST clusters for which a WGS was  
132 available were grouped in BAPS cluster 2. Similarly, all the isolates from the eBURST cluster ST410  
133 grouped into BAPS cluster 1, along with 6 isolates from ST155. Seven isolates belonged to the  
134 globally successful extra-intestinal pathogenic *E. coli* clone ST131 (Supplementary Figure 4A).

135 As observed in the WGS analysis, animal isolates were interspersed with isolates from humans and  
136 the environment throughout the tree, as were isolates from different continents indicating a lack of  
137 clustering by isolation source or geographical origin (Figure 2). Similarly, no clustering by health  
138 status of the host was observed (Supplementary Figure 4B).

139

#### 140 **Mobile genetic elements**

141 The plasmid incompatibility group of the *mcr-1*-carrying plasmids could be determined for 217  
142 Enterobacteriaceae isolates from 7 different genera (*Escherichia* sp., *Salmonella* sp., *Klebsiella* sp.,  
143 *Cronobacter* sp., *Enterobacter* sp., *Kluyvera* sp. and *Shigella* sp.), representing a total of 219 plasmids  
144 since 2 isolates carried 2 different plasmids carrying the *mcr-1* gene (Table 1). These plasmids were  
145 described in 71 studies (1 to 33 plasmids per study, average = 3.1). In addition, the gene was  
146 integrated in the chromosome of 6 isolates. The incompatibility group could not be determined for  
147 27 of the 65 isolates for which WGS was available. Similarly the plasmid type was not available for  
148 182 of the 312 isolates included in the MLST analysis. A total of 14 different plasmid incompatibility  
149 groups were identified. 198/219 (90.4%) of the identified plasmids belonged to one of 3  
150 incompatibility groups: IncX4 (77/219 plasmids, 35.2%), IncI2 (76/219 plasmids, 34.7%) and IncHI2  
151 (45/219 plasmids, 20.5%). 50/76 IncI2 plasmids (65.8%) originated from Asia and 33/45 IncHI2  
152 plasmids (73.3%) from Europe. IncX4 plasmids were more evenly distributed: 44/77 (57.1%) were  
153 recovered from Europe, 29 from Asia (37.7%) and 4 from other regions (5.2%). Observed proportions  
154 were significantly different from expected for IncI2 ( $\chi^2$ -test,  $p < 0.001$ ) and IncHI2 ( $p < 0.001$ ) but not  
155 for IncX4. The distribution of these three plasmid types between animal, human and environmental  
156 sources were not significantly different from expected. Isolates from the BAPS groups 1 and 2 carried

157 plasmids from the 3 major types in similar proportions (Supplementary Figure 5A). Isolates from the  
158 eBURST clusters of ST10 carried plasmids belonging to 7 different incompatibility groups, including  
159 IncHI2, IncI2 and IncX4. No clustering of plasmid type with MLST phylogeny was observed either  
160 (Supplementary Figure 5B).

161 Figure 3 shows the alignment of the complete sequences or contigs from IncI2 (panel A), IncX4 (B)  
162 and IncHI2 (C) incompatibility group plasmids. IncHI2 plasmids had the largest size, with sequence  
163 lengths up to 267486 bp.

164 The IS*Apl1* transposon element situated upstream of the *mcr-1* gene was present in 7/9 (77.8%)  
165 IncHI2 plasmids, but only in 11/29 (37.9%) of IncI2 plasmids and completely missing in all of the 24  
166 reported IncX4 plasmids (Figure 3). In the isolates from travellers the IS*Apl1* transposon was  
167 identified in 3 out of our 6 *mcr-1*-carrying contigs including one isolate from a traveler to Asia (ST101,  
168 IncI2 incompatibility group), one to Africa (ST744, IncHI2) and one to South-America (ST744,  
169 incompatibility group not identified).

170

### 171 **Antimicrobial resistance genes**

172 Multiple resistance genes were detected in most of the studied isolates (Supplementary Results). The  
173 florfenicol resistance gene *floR* was present in 32 (49.2%) isolates; in 22 of 45 isolates from animals  
174 (48.9%) and 10 of 19 isolates from humans (52.6%). The *baeR* and *baeS* genes, encoding novobiocin  
175 resistance, were found in 64 (98.5%) and 65 (100%) isolates, respectively.

176 Plasmid analysis from the WGS data showed that 4 of the 29 *mcr-1*-carrying IncI2 plasmids (13.8%)  
177 contained an additional ESBL gene. IncHI2 plasmids (n=9) carried between 0 and 12 additional AMR  
178 genes. In particular, 4 plasmids carried CTX-M ESBL genes and 2 carried the *floR* gene. In 4 out of the  
179 9 IncHI2 plasmids analysed in this study, the *mcr-1* gene was shown to be integrated alongside a  
180 large multi-drug resistance (MDR) gene cassette (Figure 3C). None of the IncX4 plasmids carried  
181 additional AMR genes.

182

### 183 **Discussion**

184 Analysis of all reported WGS of *mcr-1*-carrying isolates shows that the population of *E. coli* is highly  
185 diverse, but is dominated by two large groups of related isolates. Most of the isolates from BAPS  
186 group 2 grouped into a MLST cluster centred on ST10. An overrepresentation of isolates related to  
187 ST10 and ST165 (a SLV of ST1114) in *mcr-1*-carrying *E. coli* isolates was previously reported at a  
188 smaller scale in isolates from European farm animals<sup>19</sup>. *E. coli* ST10 and closely related STs are  
189 frequently recovered from food and human intestinal samples and studies have shown a higher  
190 prevalence of plasmid-carried AMR genes in ST10, including CTX-M ESBL genes, compared to other  
191 STs<sup>20-23</sup>.

192 The second BAPS group of interest in our study included isolates belonging to ST155. This ST has  
193 been described as a major vector of spread of ESBL genes from animals to humans <sup>24</sup>. It is thus  
194 possible that zoonotic transmission lead to the spread of the *mcr-1* gene, as has been suggested in  
195 studies from China and Vietnam <sup>16,17</sup>, notably through the two main phylogenetic clusters identified  
196 in this study.

197 Additionally, we found clonally related isolates, including some belonging to ST744, a SLV of ST10,  
198 carrying the *mcr-1* gene on different plasmid backbones and recovered from different continents  
199 (see Supplementary Results). These results point towards a worldwide dissemination of *mcr-1* driven  
200 mainly by highly promiscuous plasmids rather than the worldwide spread of one or more *mcr-1*-  
201 carrying clones. We hypothesize that several populations of *E. coli* isolates, notably those related to  
202 ST10 or ST155, acquired the *mcr-1* gene due to their intrinsic ability of acquiring AMR genes and their  
203 high prevalence in humans and food animals. These populations of commensal isolates then may  
204 play a crucial role as a reservoir for this gene, which can explain their over-representation in the  
205 present study.

206 In the timeframe of our literature search, 3 *E. coli* strains carrying the *mcr-2* gene were isolated from  
207 animals in Belgium. These isolates belonged to ST10 (2 isolates) and ST167 which is a SLV of ST10 and  
208 carried the gene on an IncX4-type plasmid. No WGS data was available from these isolates <sup>25</sup>.

209 More than 90% of published plasmid types carrying *mcr-1* genes belonged to either IncI2, IncX4 or  
210 IncHI2. Almost 75% of the isolates carrying an IncHI2 plasmid originated from Europe: 26 from  
211 animals and 7 from humans (Table 1 and Supplementary Table 1). In a traveller's isolate acquired in  
212 Tunisia, the *mcr-1*-carrying plasmid was identified as an IncHI2-type backbone of the ST4 pMLST  
213 subtype which co-carried a CTX-M-1 ESBL gene (Figure 3C). This traveller reported consumption of  
214 beef and chicken and eggs during travel to Tunisia which can potentially be the source for the  
215 acquisition of the *mcr-1* positive isolate. When investigating the presence of the *mcr-1* gene in  
216 cephalosporin resistant *E. coli* isolates from chicken farms in Tunisia, Grami *et al.* <sup>26</sup> found that all 37  
217 *mcr-1*-carrying plasmids also belonged to the IncHI2-type, ST4 subtype and harboured CTX-M-1  
218 genes. PFGE typing of the isolates harbouring this plasmid showed various bacterial genetic  
219 backgrounds. Interestingly, these chickens were all imported from France, either as adults or chicks.  
220 Other studies showed the presence of this IncHI2, CTX-M-1 and *mcr-1* combination in *Salmonella*  
221 *enterica* Typhimurium isolates from meat samples in Portugal from 2011 <sup>27,28</sup> and diarrhoeic veal  
222 calves in France <sup>29</sup>. The IncHI2 subtype ST4 was also detected in an *E. coli* isolate from retail chicken  
223 breast in Germany <sup>30</sup> and the faecal sample of a veal calve from the Netherlands <sup>31</sup>, suggesting  
224 widespread dissemination of this particular plasmid in European farm animals and possible  
225 transmission to humans.



226 The high prevalence of novobiocin *baeR* and *baeS* and florfenicol *floR* resistance genes<sup>32,33</sup> in the  
227 genomes of isolates of human and animal origin together with the fact that florfenicol and  
228 novobiocin are used almost exclusively in veterinary medicine further supports the potential role of  
229 food animals as an important reservoir of *mcr-1* containing bacteria and MGEs<sup>15</sup>.

230 In contrast with the IncHI2 plasmids, 65.8% of all IncI2 plasmid recovered so far originated from Asia,  
231 with a much lower prevalence in *mcr-1* carrying Enterobacteriaceae from other regions. Taken  
232 together, these elements point toward a more regional circulation and dissemination of the *mcr-1*-  
233 carrying plasmids IncI2 and IncHI2.

234 We found the IS*ApI1* transposon element associated with the *mcr-1* gene, as originally described by  
235 Liu *et al.*<sup>8</sup> to be present in a minority of studied plasmids and contigs. However, since some of the  
236 *mcr-1*-carrying contigs were obtained by assembly of Illumina short reads from WGS data, we cannot  
237 exclude that some of these gaps are explained by an incomplete assembly of (plasmid) sequences.  
238 The IS*ApI1* transposon element is considered to be the main driver of horizontal gene transfer of the  
239 *mcr-1* gene and has been shown to be highly unstable in IncI2 plasmids<sup>34–36</sup>. The absence of the  
240 IS*ApI1* transposon element in *mcr-1*-carrying IncX4 plasmids as described here has recently been  
241 proposed to be essential for the maintenance of the *mcr-1* gene in this particular backbone, but the  
242 exact mechanism still requires further investigation<sup>37</sup>.

243 WGS analysis provided in-depth information about the *mcr-1*-carrying *E. coli* isolates and their  
244 phylogenetic relationship, but the number of available genomes was limited. On the other hand,  
245 whilst MLST data have a lower resolution, the higher number of available profiles allowed analysis of  
246 the isolates' origin (geographical, source of isolation, diseased status of the host, etc.).

247

248 A limitation of our study is the potential for bias. The overrepresentation of isolates originating from  
249 Asia and Europe could be explained by a higher prevalence of *mcr-1* genes on these continents, but  
250 the effect of publication bias cannot be excluded. Isolates from North-America only represented  
251 2.2% of the collection. Noteworthy, colistin, except for ophthalmic ointment, has never been  
252 marketed for use in animals in the United States<sup>38,39</sup>.

253

254 Sampling bias should also be considered when several isolates with an identical ST are presented  
255 from a single study, as is the case for ST100 and ST752. Additionally, in the absence of a control  
256 population of *mcr-1*-negative isolates obtained from similar sources as the *mcr-1* positive isolates,  
257 results of analysis of population structures should be interpreted with caution. Because many studies  
258 screened existing collections of (resistant) isolates for colistin resistance or presence of *mcr-1*,  
259 selection bias has probably been introduced.

260 The findings in this study suggests that the *mcr-1* gene has locally and globally disseminated through  
261 MGEs that are mainly IncHI2, IncI2 an IncX4 plasmids and provides additional support for the  
262 hypothesis of the animal reservoir, that is driven by the use of colistin in livestock, as a source of *mcr-*  
263 *1* in humans. A global ban of colistin use in animals to preserve colistin for use in human medicine  
264 seems therefore justified.

265

## 266 **Material and Methods**

### 267 **Selection of isolates for whole genome sequencing**

268 We subjected six *mcr-1* positive isolates that were collected as part of a prospective study (COMBAT  
269 study) aimed at studying acquisition of extended-spectrum  $\beta$ -lactamase (ESBL) -producing  
270 Enterobacteriaceae during travel to whole-genome sequencing<sup>14,40</sup>. Additionally, we included 22  
271 whole genome sequences of isolates from Vietnamese chickens and humans that were still  
272 unpublished when performing our literature search<sup>17</sup>.

273

### 274 **Literature search**

275 Relevant papers that published on *mcr-1* and *mcr-2* were identified in PubMed, Web of Science,  
276 Scopus, ScienceDirect and Google Scholar using the query 'mcr-1 OR mcr1 OR mcr-2 OR mcr2 OR  
277 (mcr AND colistin)' (see Supplementary Material for full search strategies).

278

### 279 **Whole genome sequencing of *mcr-1*-positive *E. coli* isolates**

280 Bacterial DNA was extracted from fresh pure cultures using the Qiagen DNeasy Blood and Tissue kit  
281 (Qiagen, Hilden, Germany). Library preparation was done according to manufacturer's instruction  
282 (Illumina, San Diego, CA, USA) and sequenced using Illumina MiSeq technology with 150 paired-end  
283 settings. Sequences have been deposited in the European Nucleotide Archive under the accession  
284 numbers ERS1694334 to ERS1694339.

285

### 286 **Bio-informatic analysis**

#### 287 ***MLST analysis***

288 For each *mcr-1*-carrying *E. coli* isolate for which the ST or the whole genome sequence was available,  
289 the sequences of the corresponding alleles were downloaded from the *E. coli* MLST genes repository  
290 of the University of Warwick  
291 (<http://mlst.warwick.ac.uk/mlst/dbs/Ecoli/handlers/getFileData/home/cbailster/mlst/zope/Extensio>

292 [ns/gadfly/Ecoli/DB/](#)) and concatenated. When STs of isolates were not described in literature, the ST  
293 was determined from available whole genomes using the online service provided by the Center for  
294 Genomic Epidemiology (<https://cge.cbs.dtu.dk/services/MLST/>) according to the Achtman MLST  
295 scheme<sup>41,42</sup>. MLST clusters (STs and their single locus or double locus variants) were defined using e-  
296 burst V3 ([http://eburst.mlst.net/v3/enter\\_data/single/](http://eburst.mlst.net/v3/enter_data/single/))<sup>43</sup> and goeBURST v1.2.1<sup>44</sup> using only profiles  
297 from this study.

### 298 *WGS and plasmid analysis*

299 Whole genome and plasmid sequences were downloaded from online databases for all available  
300 isolates. Additional sequences not yet deposited in online databases were requested from their  
301 respective authors. The quality of the sequence reads was checked using fastqc  
302 (<http://www.bioinformatics.babraham.ac.uk/projects/fastqc/>), quast<sup>45</sup> and KmerFinder 2.0  
303 (<https://cge.cbs.dtu.dk/services/KmerFinder/>) (see Supplementary Methods for more details). Reads  
304 were trimmed using Trimmomatic V0.33<sup>46</sup>. *De-novo* genome assembly was performed with SPAdes  
305 3.9<sup>47</sup> for Illumina short reads and with Canu v1.3 for PacBio long reads<sup>48</sup>. Identification of open  
306 reading frames (ORFs) and gene contents in the assembled genomes was performed using Prokka  
307 v1.11<sup>49</sup>. Core genome analysis was performed with Roary v3.6.8<sup>50</sup>. Clustering of isolates was  
308 performed using the hierBAPS module of the Bayesian Analysis of Population Structure (BAPS)  
309 software v6.0<sup>18</sup>. The core genome alignment output provided by Roary was used as input with 2  
310 levels of hierarchy and a maximum number of cluster (K) of 10. The estimated number of clusters  
311 was 5 for both levels of hierarchy.

312 Sequences (concatenated MLST loci or concatenated core genes) were aligned using mafft v6.864b  
313<sup>51</sup>. The resulting alignment was used as input for calculation of distances and tree building using  
314 RAxML v8.1.6<sup>52</sup>. TMLST and WGS trees were visualized using iTOL v3.3.1 (<http://itol.embl.de/>)<sup>53</sup>.

315 Identification of plasmid incompatibility group and typing of IncHI2 plasmids were performed via the  
316 CGE online services PlasmidFinder v1.3 (<https://cge.cbs.dtu.dk/services/PlasmidFinder/>) and pMLST  
317 v1.4 (<https://cge.cbs.dtu.dk/services/pMLST/>)<sup>54</sup>. Alignment and visualization of plasmids was  
318 performed with BRIG v0.95<sup>55</sup>.

319 Two different databases were used for identification of other antibiotic resistance genes: ResFinder  
320 (<https://cge.cbs.dtu.dk/services/ResFinder/>)<sup>56</sup> was used to detect acquired resistance genes  
321 commonly located on mobile genetic elements (MGEs) and CARD Resistance Gene Identifier  
322 (<https://card.mcmaster.ca/analyze/rgi>)<sup>57</sup> was used to detect chromosomal genes.

323 **Statistics**

324 The distribution of isolates from different geographical origins and isolation sources was determined  
325 by a chi-square test comparing the expected distribution (proportions of the total studied  
326 population) to the observed proportions using GraphPad Prism6 (La Jolla, CA, USA).

327

328 **Acknowledgments**

329 The authors would like to thank the team of the Department of Genome analysis of the AMC (in  
330 particular Dr. F. Baas and L. Koster) for their support in the sequencing bacterial genomes.

331 Financial support for this study was provided by the European COMPARE project  
332 (<http://www.compare-europe.eu/>) under the European Union's Horizon 2020 research and  
333 innovation programme, grant agreement No. 643476.

334 Additional funding was obtained from the Netherlands Organisation for Health Research and  
335 Development (ZonMw) (VIBRE and COMBAT studies).

336

## 337 References

338

- 339 1. Appelbaum, P. C. 2012 and beyond: Potential for the start of a second pre-antibiotic era? *J.*  
340 *Antimicrob. Chemother.* **67**, 2062–2068 (2012).
- 341 2. Brown, E. D. & Wright, G. D. Antibacterial drug discovery in the resistance era. *Nature* **529**,  
342 336–343 (2016).
- 343 3. Laxminarayan, R. *et al.* Antibiotic resistance-the need for global solutions. *Lancet Infect. Dis.*  
344 **13**, 1057–1098 (2013).
- 345 4. Koyama, Y., Kurosasa, A., Tsuchiya, A. & Takakuta, K. A new antibiotic ‘colistin’ produced by  
346 spore-forming soil bacteria. *J Antibiot* **3**, 457–458 (1950).
- 347 5. Lim, L. M. *et al.* Resurgence of colistin: a review of resistance, toxicity, pharmacodynamics,  
348 and dosing. *Pharmacotherapy* **30**, 1279–91 (2010).
- 349 6. Catry, B. *et al.* Use of colistin-containing products within the European Union and European  
350 Economic Area (EU/EEA): development of resistance in animals and possible impact on human  
351 and animal health. *Int. J. Antimicrob. Agents* **46**, 297–306 (2015).
- 352 7. Olaitan, A. O., Morand, S. & Rolain, J. Mechanisms of polymyxin resistance : acquired and  
353 intrinsic resistance in bacteria. *Front. Microbiol.* **5**, 1–18 (2014).
- 354 8. Liu, Y.-Y. *et al.* Emergence of plasmid-mediated colistin resistance mechanism MCR-1 in  
355 animals and human beings in China: a microbiological and molecular biological study. *Lancet*  
356 *Infect. Dis.* **3099**, (2015).
- 357 9. Skov, R. L. & Monnet, D. L. Plasmid-mediated colistin resistance (mcr-1 gene): three months  
358 later, the story unfolds. *Eurosurveillance* **21**, (2016).
- 359 10. Schwarz, S. & Johnson, A. P. Transferable resistance to colistin: a new but old threat. *J.*  
360 *Antimicrob. Chemother.* **71**, 2066–2070 (2016).
- 361 11. Leangapichart, T. *et al.* Acquisition of mcr-1 Plasmid-Mediated Colistin Resistance in  
362 *Escherichia coli* and *Klebsiella pneumoniae* during Hajj 2013 and 2014. *Antimicrob. Agents*

- 363 *Chemother.* **60**, 6998–6999 (2016).
- 364 12. Vading, M. *et al.* Frequent acquisition of low-virulence strains of ESBL-producing *Escherichia*  
365 *coli* in travellers. *J. Antimicrob. Chemother.* **71**, 3548–3555 (2016).
- 366 13. Bernasconi, O. J. *et al.* Travelers Can Import Colistin-Resistant Enterobacteriaceae, Including  
367 Those Possessing the Plasmid-Mediated *mcr-1* Gene. *Antimicrob. Agents Chemother.* **60**,  
368 5080–5084 (2016).
- 369 14. Arcilla, M. S. *et al.* Dissemination of the *mcr-1* colistin resistance gene. *Lancet*  
370 *Infect. Dis.* **16**, 147–149 (2016).
- 371 15. Poirel, L. & Nordmann, P. Emerging plasmid-encoded colistin resistance: the animal world as  
372 the culprit? *J. Antimicrob. Chemother.* **71**, 2326–2327 (2016).
- 373 16. Wang, Y. *et al.* Comprehensive resistome analysis reveals the prevalence of NDM and MCR-1  
374 in Chinese poultry production. *Nat. Microbiol.* **2**, 16260 (2017).
- 375 17. Trung, N. V. *et al.* Zoonotic Transmission of *mcr-1* Colistin Resistance Gene from  
376 Small-Scale Poultry Farms, Vietnam. *Emerg. Infect. Dis. J.* **23**, 529 (2017).
- 377 18. Cheng, L., Connor, T. R., Sirén, J., Aanensen, D. M. & Corander, J. Hierarchical and spatially  
378 explicit clustering of DNA sequences with BAPS software. *Mol. Biol. Evol.* **30**, 1224–1228  
379 (2013).
- 380 19. El Garch, F. *et al.* *mcr-1* is borne by highly diverse *Escherichia coli* isolates since 2004 in food-  
381 producing animals in Europe. *Clin. Microbiol. Infect.* **23**, 51e1-51e4 (2017).
- 382 20. Manges, A. R. & Johnson, J. R. Food-Borne Origins of *Escherichia coli* Causing Extraintestinal  
383 Infections. *Clin. Infect. Dis.* **55**, 712–719 (2012).
- 384 21. Oteo, J. *et al.* Extended-spectrum  $\beta$ -lactamase-producing *Escherichia coli* in Spain belong to a  
385 large variety of multilocus sequence typing types, including ST10 complex/A, ST23 complex/A  
386 and ST131/B2. *Int. J. Antimicrob. Agents* **34**, 173–176 (2009).
- 387 22. Fam, N. *et al.* CTX-M-15-producing *Escherichia coli* clinical isolates in Cairo (Egypt), including  
388 isolates of clonal complex ST10 and clones ST131, ST73, and ST405 in both community and

- 389 hospital settings. *Microb. Drug Resist.* **17**, 67–73 (2011).
- 390 23. Manges, A. R. *et al.* Clonal distribution and associated characteristics of Escherichia coli  
391 clinical and surveillance isolates from a military medical center. *Diagn. Microbiol. Infect. Dis.*  
392 **87**, 382–385 (2017).
- 393 24. Skurnik, D. *et al.* Emergence of antimicrobial-resistant Escherichia coli of animal origin  
394 spreading in humans. *Mol. Biol. Evol.* **33**, 898–914 (2016).
- 395 25. Xavier, B. B. *et al.* Identification of a novel plasmid-mediated colistinresistance gene, mcr-2, in  
396 Escherichia coli, Belgium, june 2016. *Eurosurveillance* **21**, (2016).
- 397 26. Grami, R. *et al.* Impact of food animal trade on the spread of mcr-1-mediated colistin  
398 resistance, tunisia, july 2015. *Eurosurveillance* **21**, 1–5 (2016).
- 399 27. Tse, H. & Yuen, K.-Y. Dissemination of the mcr-1 colistin resistance gene. *Lancet Infect. Dis.*  
400 **3099**, 3099 (2015).
- 401 28. Figueiredo, R., Henriques, A., Sereno, R., Mendonça, N. & da Silva, G. J. Antimicrobial  
402 Resistance and Extended-Spectrum  $\beta$ -Lactamases of Salmonella enterica Serotypes Isolated  
403 from Livestock and Processed Food in Portugal: An Update. *Foodborne Pathog. Dis.* **12**, 110–  
404 117 (2014).
- 405 29. Haenni, M. *et al.* Co-occurrence of extended spectrum  $\beta$  lactamase and MCR-1 encoding  
406 genes on plasmids. *Lancet Infect. Dis.* **3099**, 3099 (2016).
- 407 30. Falgenhauer, L. *et al.* Chromosomal Locations of mcr-1 and bla(CTX-M-15) in Fluoroquinolone-  
408 Resistant Escherichia coli ST410. *Emerg. Infect. Dis.* **22**, 1689–1691 (2016).
- 409 31. Veldman, K. *et al.* Location of colistin resistance gene mcr-1 in Enterobacteriaceae from  
410 livestock and meat. *J. Antimicrob. Chemother.* (2016). doi:10.1093/jac/dkw181
- 411 32. Lilic, M., Jovanovic, M., Jovanovic, G. & Savic, D. J. Identification of the CysB-regulated gene,  
412 hslJ, related to the Escherichia coli novobiocin resistance phenotype. *FEMS Microbiol. Lett.*  
413 **224**, 239–246 (2003).
- 414 33. Baranova, N. & Nikaido, H. The BaeSR Two-Component Regulatory System Activates

- 415 Transcription of the yegMNOB (mdtABCD) Transporter Gene Cluster in Escherichia coli and  
416 Increases Its Resistance to Novobiocin and Deoxycholate. *J. Bacteriol.* **184**, 4168–4176 (2002).
- 417 34. Stoesser, N., Mathers, A. J., Moore, C. E., Day, N. P. & Crook, D. W. Colistin resistance gene  
418 mcr-1 and pHNSHP45 plasmid in human isolates of Escherichia coli and Klebsiella  
419 pneumoniae. *Lancet Infect. Dis.* **3099**, 3099 (2016).
- 420 35. Falgenhauer, L. *et al.* Colistin resistance gene mcr-1 in extended-spectrum  $\beta$ -lactamase-  
421 producing and carbapenemase-producing Gram-negative bacteria in Germany. *Lancet Infect.*  
422 *Dis.* **3099**, 3099 (2016).
- 423 36. Snesrud, E. *et al.* Analysis of Serial Isolates of mcr-1- positive Escherichia coli Reveals a Highly  
424 Active ISAp1 Transposon. *Antimicrob. Agents Chemother.* (2017). doi:10.1128/AAC.00056-17
- 425 37. Sun, J. *et al.* Genetic Analysis of the IncX4 Plasmids: Implications for a Unique Pattern in the  
426 mcr-1 Acquisition. *Sci. Rep.* **7**, 424 (2017).
- 427 38. FDA. *2015 Summary Report On Antimicrobials Sold or Distributed for Use in Food-Producing*  
428 *Animals.* (2016).
- 429 39. European Medicines Agency. *Updated advice on the use of colistin products in animals within*  
430 *the European Union: development of resistance and possible impact on human and animal*  
431 *health.* **44**, (2016).
- 432 40. Arcilla, M. S. *et al.* Import and spread of extended-spectrum beta-lactamase-producing  
433 Enterobacteriaceae by international travellers (COMBAT study): a prospective, multicentre  
434 cohort study. *Lancet Infect. Dis.* **17**, 78–85 (2017).
- 435 41. Larsen, M. V. *et al.* Multilocus sequence typing of total-genome-sequenced bacteria. *J. Clin.*  
436 *Microbiol.* **50**, 1355–1361 (2012).
- 437 42. Wirth, T. *et al.* Sex and virulence in Escherichia coli: An evolutionary perspective. *Mol.*  
438 *Microbiol.* **60**, 1136–1151 (2006).
- 439 43. Feil Edward J an d Li, B. C., Aanensen, D. M., Hanage, W. P. & Spratt, B. G. eBURST: inferring  
440 patterns of evolutionary descent among clusters of related bacterial genotypes from



- 441 multilocus sequence typing data. *J. Bacteriol.* **186**, 1518–1530 (2004).
- 442 44. Francisco, A. P., Bugalho, M., Ramirez, M. & Carriço, J. a. Global optimal eBURST analysis of  
443 multilocus typing data using a graphic matroid approach. *BMC Bioinformatics* **10**, 152 (2009).
- 444 45. Gurevich, A., Saveliev, V., Vyahhi, N. & Tesler, G. QUASt: quality assessment tool for genome  
445 assemblies. *Bioinformatics* **29**, 1072–1075 (2013).
- 446 46. Bolger, A. M., Lohse, M. & Usadel, B. Trimmomatic: A flexible trimmer for Illumina sequence  
447 data. *Bioinformatics* **30**, 2114–2120 (2014).
- 448 47. Bankevich, A. *et al.* SPAdes: A New Genome Assembly Algorithm and Its Applications to  
449 Single-Cell Sequencing. *J. Comput. Biol.* **19**, 455–477 (2012).
- 450 48. Koren, S. *et al.* Canu: scalable and accurate long-read assembly via adaptive k-mer weighting  
451 and repeat separation. *bioRxiv* (2017).
- 452 49. Seemann, T. Prokka: Rapid prokaryotic genome annotation. *Bioinformatics* **30**, 2068–2069  
453 (2014).
- 454 50. Page, A. J. *et al.* Roary: Rapid large-scale prokaryote pan genome analysis. *Bioinformatics* **31**,  
455 3691–3693 (2015).
- 456 51. Katoh, K. & Toh, H. Recent developments in the MAFFT multiple sequence alignment  
457 program. *Brief. Bioinform.* **9**, 286–298 (2008).
- 458 52. Stamatakis, A. RAxML version 8: a tool for phylogenetic analysis and post-analysis of large  
459 phylogenies. *Bioinformatics* **30**, 1312–1313 (2014).
- 460 53. Letunic, I. & Bork, P. Interactive tree of life (iTOL) v3: an online tool for the display and  
461 annotation of phylogenetic and other trees. *Nucleic Acids Res.* **44**, W242–W245 (2016).
- 462 54. Carattoli, A. *et al.* In Silico Detection and Typing of Plasmids using PlasmidFinder and Plasmid  
463 Multilocus Sequence Typing. *Antimicrob. Agents Chemother.* **58**, 3895–3903 (2014).
- 464 55. Alikhan, N.-F., Petty, N. K., Ben Zakour, N. L. & Beatson, S. A. BLAST Ring Image Generator  
465 (BRIG): simple prokaryote genome comparisons. *BMC Genomics* **12**, 402 (2011).
- 466 56. Zankari, E. *et al.* Identification of acquired antimicrobial resistance genes. *J. Antimicrob.*

467            *Chemother.* **67**, 2640–2644 (2012).

468    57.    McArthur, A. G. & Wright, G. D. Bioinformatics of antimicrobial resistance in the age of  
469            molecular epidemiology. *Curr. Opin. Microbiol.* **27**, 45–50 (2015).

470

471

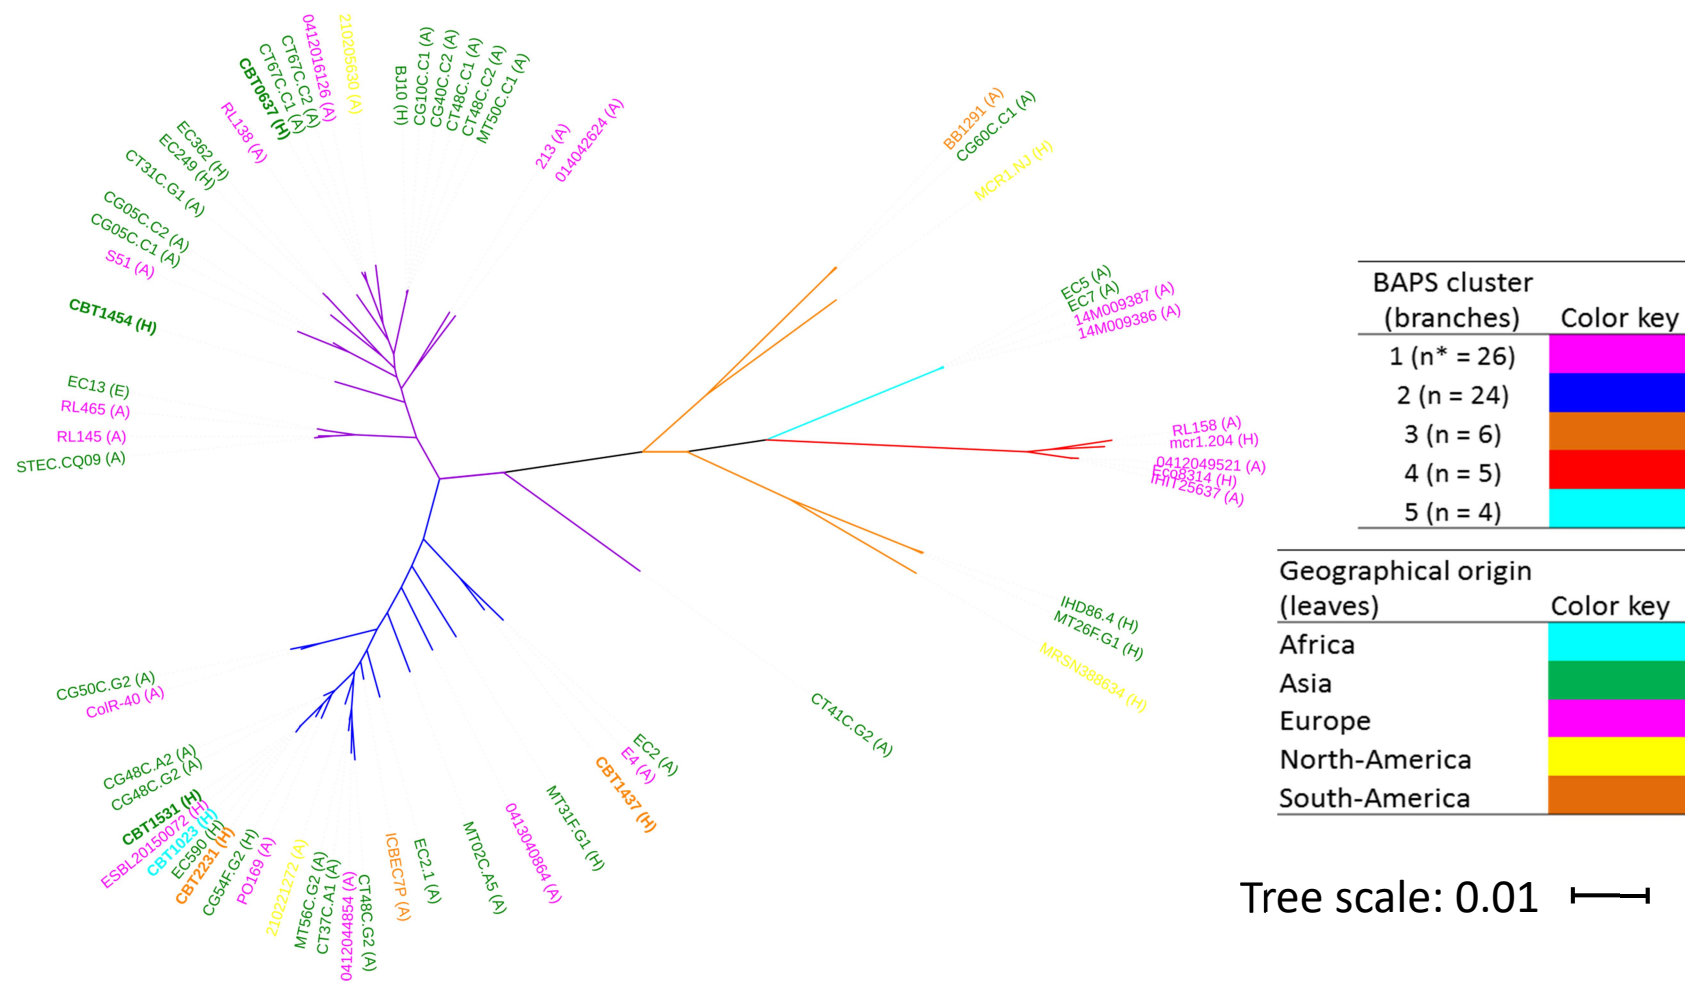

**Figure 1:** Maximum-likelihood tree based on concatenated core genome sequences of 65 *mcr-1*-carrying *E. coli* isolates.

Branch colours indicate phylogenetic clusters as determined by BAPS. Isolates from ST10, ST165 and closely related isolates are all grouped in the blue cluster. Leaves (isolates identifiers) colours indicate geographical region of origin. Isolation source is indicated in brackets: A = animal or meat; H = human; E = environment. Isolates from travellers are highlighted in bold. Tree scale in number of substitutions per site.

\*number of isolates in the corresponding cluster.

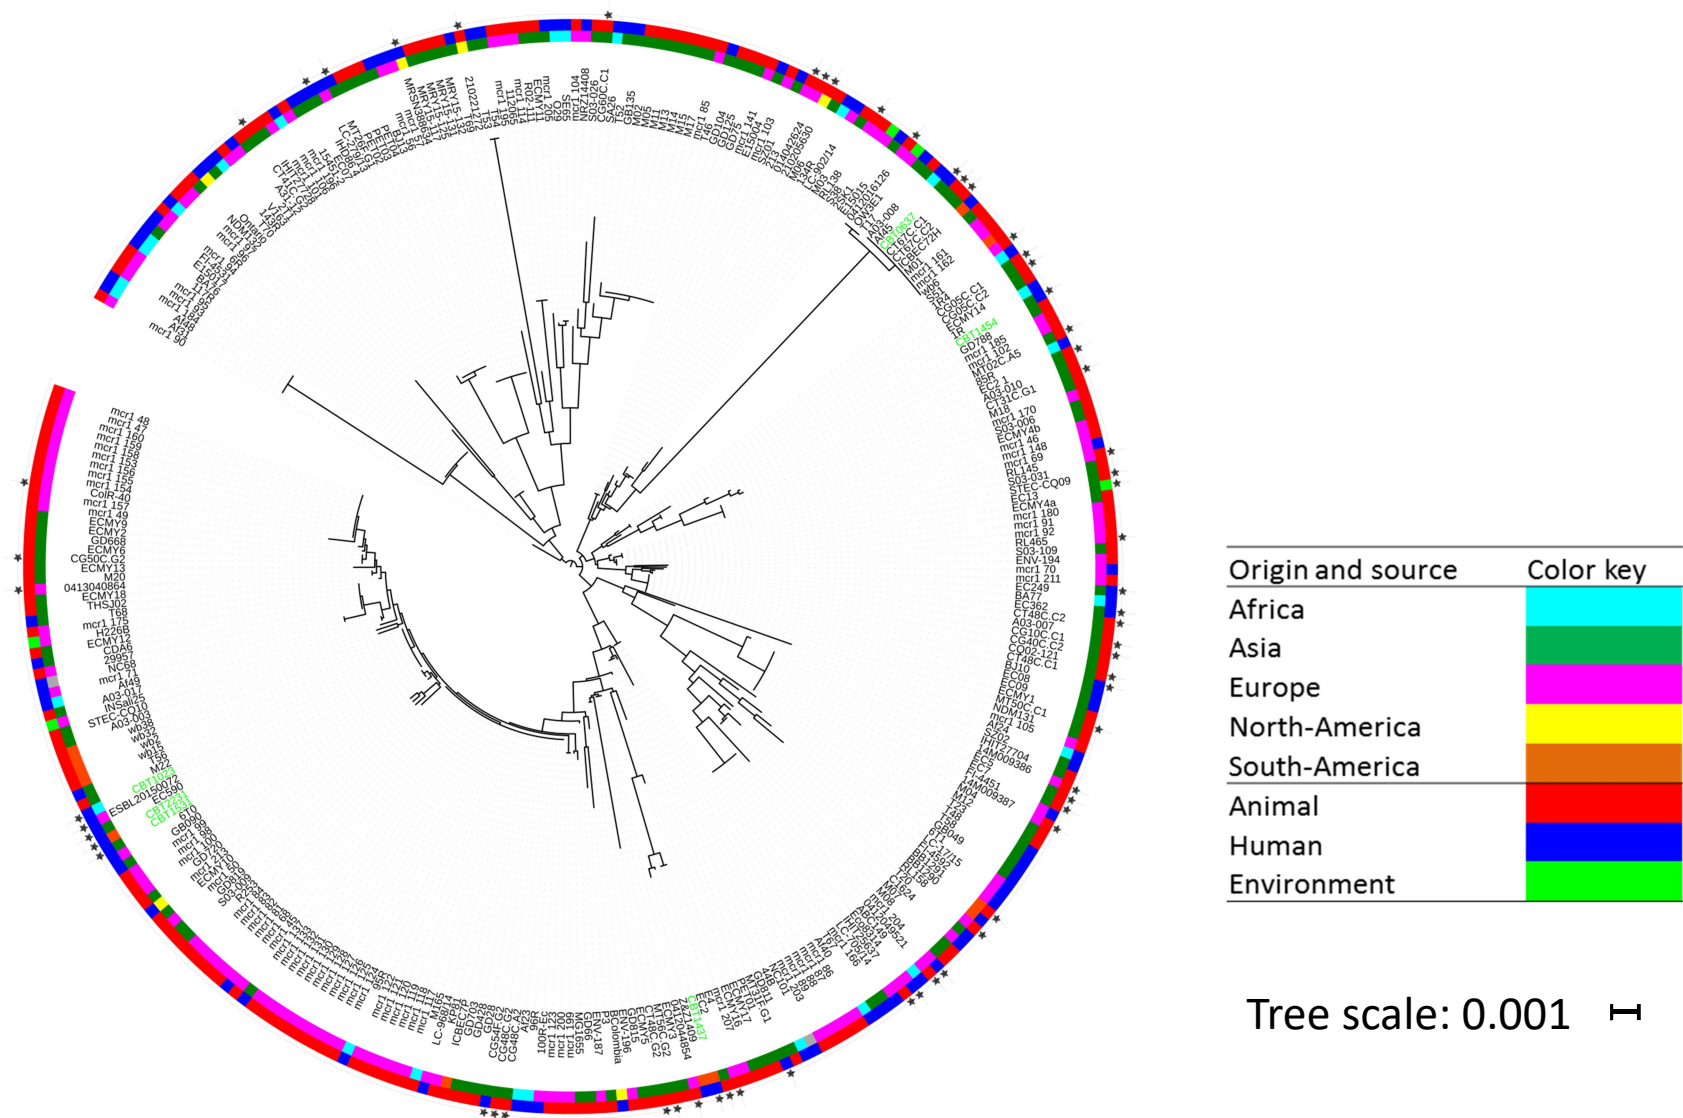

**Figure 2:** Phylogeny of the *mcr-1*-carrying *E. coli* isolates. Maximum-likelihood tree based on concatenated MLST gene sequences, mid-point rooted.

Inner coloured circle: region of origin; outer circle: isolation source. Stars indicate the isolates from which a whole genome sequence was available. Isolates from travellers are highlighted in green. Tree scale in number of substitutions per site.

See Supplementary Figure 4A for additional information on the relationship between STs, eBURST clustering and WGS BAPS clustering.

|                     | IncF         | IncFI        | IncFIB       | IncFII       | IncHI1       | IncHI1A/<br>IncHI1B/<br>IncFIA | IncHI2        | Incl2         | Incl2-<br>IncX4 | IncP         | IncX3-X4     | IncX4         | IncY         | repB<br>(p0111) | <b>Total<br/>plasmids</b> |               | Chromosome |
|---------------------|--------------|--------------|--------------|--------------|--------------|--------------------------------|---------------|---------------|-----------------|--------------|--------------|---------------|--------------|-----------------|---------------------------|---------------|------------|
| Africa              | 0            | 0            | 1            | 0            | 0            | 0                              | 4             | 8             | 0               | 0            | 0            | 1             | 0            | 0               | <b>14</b>                 | <b>6.4%</b>   | 0          |
| Asia                | 1            | 3            | 0            | 0            | 0            | 2                              | 7             | 50            | 0               | 1            | 1            | 29            | 2            | 0               | <b>96</b>                 | <b>43.8%</b>  | 2          |
| Europe              | 0            | 0            | 2            | 1            | 1            | 0                              | 33            | 5             | 0               | 3            | 0            | 44            | 0            | 1               | <b>90</b>                 | <b>41.1%</b>  | 4          |
| North-America       | 1            | 0            | 0            | 0            | 0            | 0                              | 1             | 4             | 0               | 0            | 0            | 1             | 0            | 0               | <b>7</b>                  | <b>3.2%</b>   | 0          |
| Oceania             | 0            | 0            | 0            | 0            | 0            | 0                              | 0             | 2             | 0               | 0            | 0            | 0             | 0            | 0               | <b>2</b>                  | <b>0.9%</b>   | 0          |
| South-America       | 0            | 0            | 0            | 0            | 0            | 0                              | 0             | 7             | 1               | 0            | 0            | 2             | 0            | 0               | <b>10</b>                 | <b>4.6%</b>   | 0          |
| <b>Total</b>        | <b>2</b>     | <b>3</b>     | <b>3</b>     | <b>1</b>     | <b>1</b>     | <b>2</b>                       | <b>45</b>     | <b>76</b>     | <b>1</b>        | <b>4</b>     | <b>1</b>     | <b>77</b>     | <b>2</b>     | <b>1</b>        | <b>219</b>                |               |            |
| <b>(% of total)</b> | <b>(0.9)</b> | <b>(1.4)</b> | <b>(1.4)</b> | <b>(0.5)</b> | <b>(0.5)</b> | <b>(0.9)</b>                   | <b>(20.5)</b> | <b>(34.7)</b> | <b>(0.5)</b>    | <b>(1.8)</b> | <b>(0.5)</b> | <b>(35.2)</b> | <b>(0.9)</b> | <b>(0.5)</b>    | <b>(100)</b>              | <b>100.0%</b> | <b>6</b>   |

**Table 1:** Incompatibility types of mcr-1 carrying plasmids and repartition by geographical regions

# A: Incl2

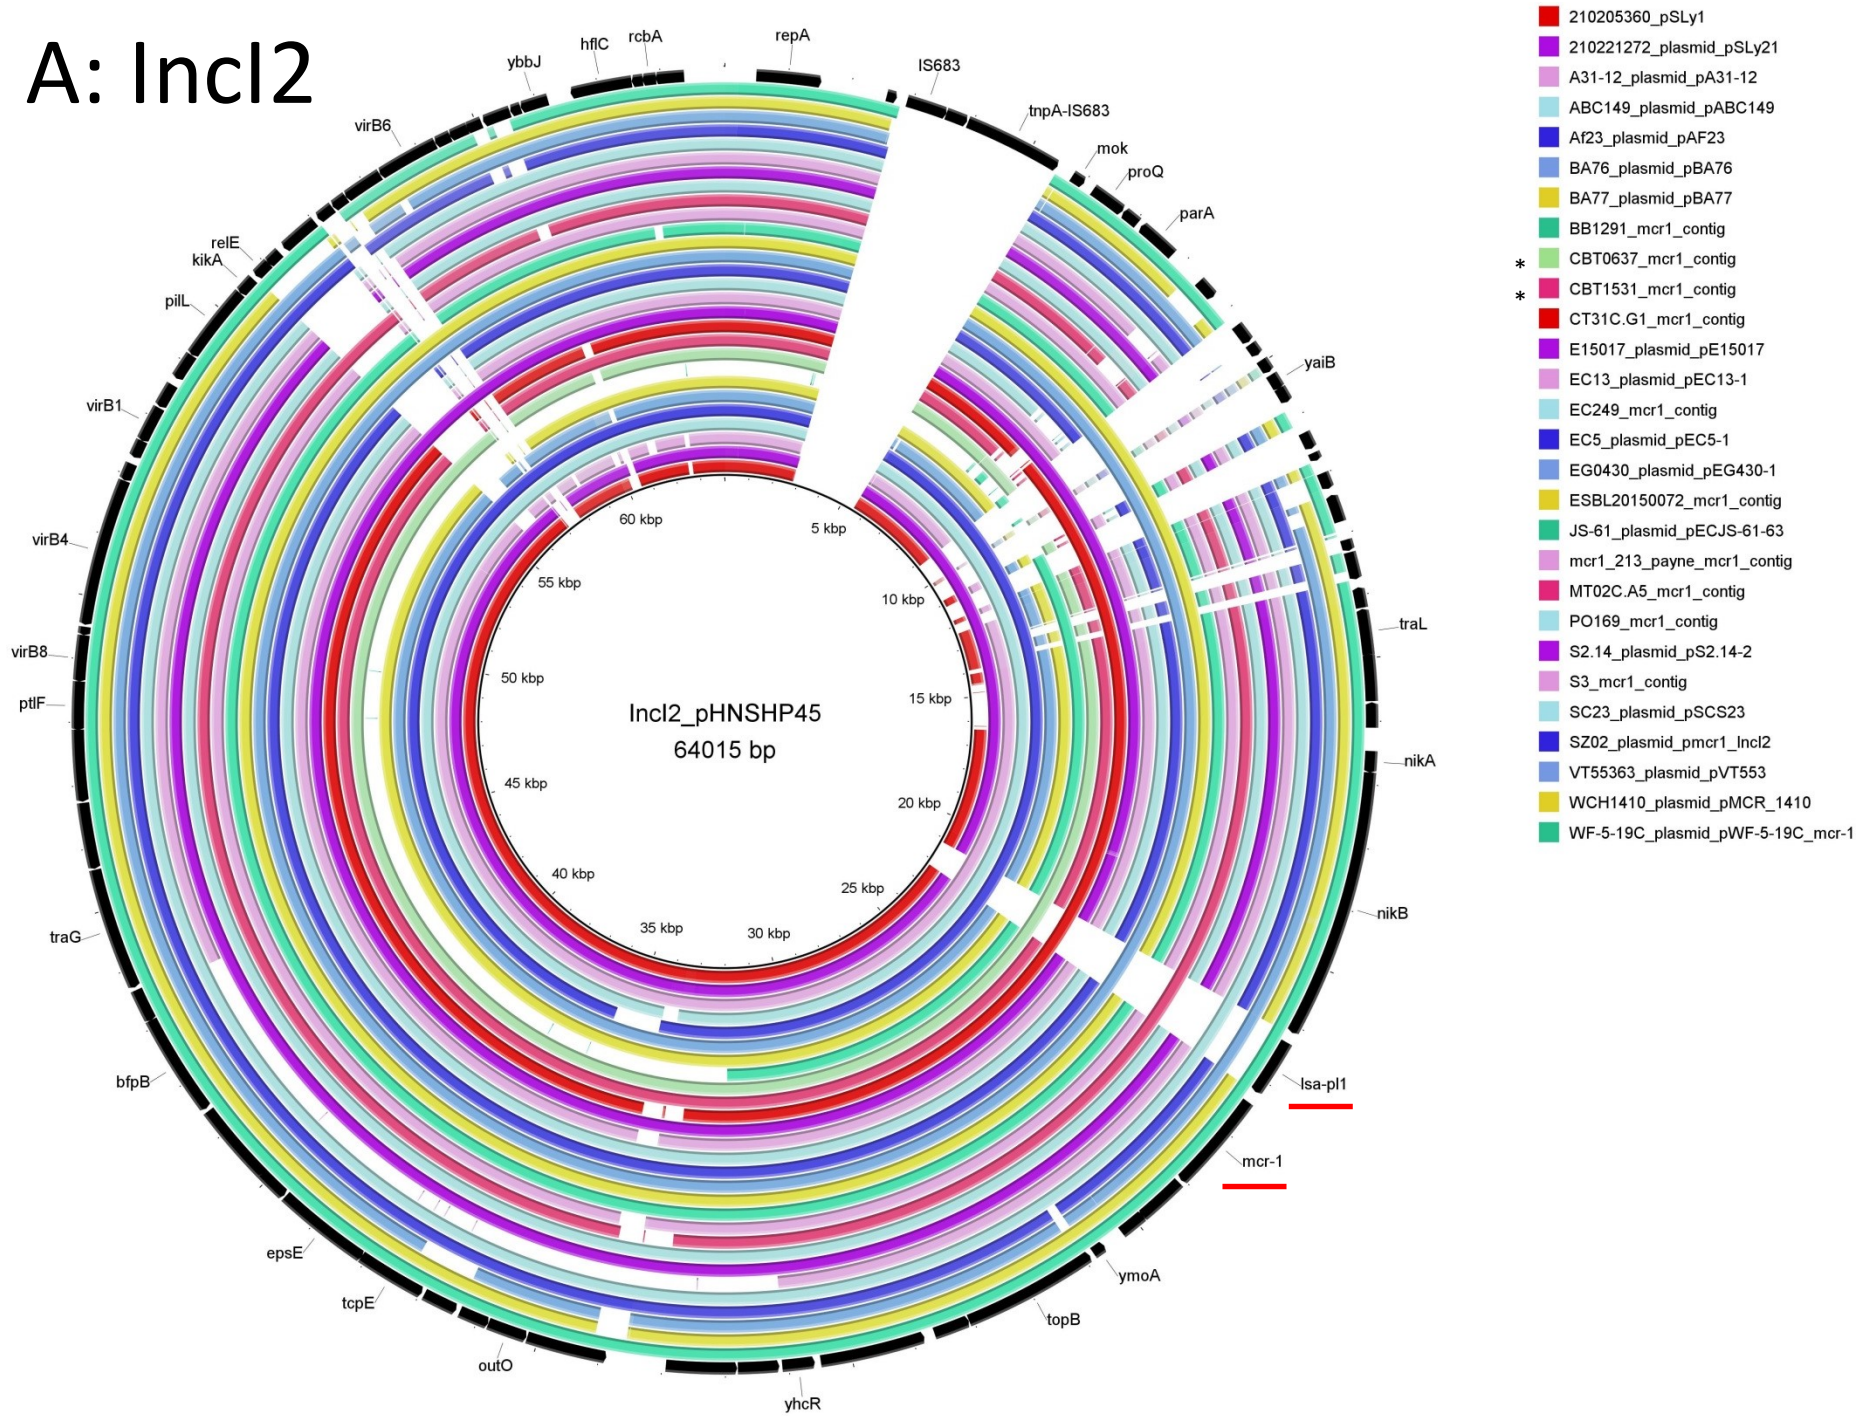

# B: IncX4

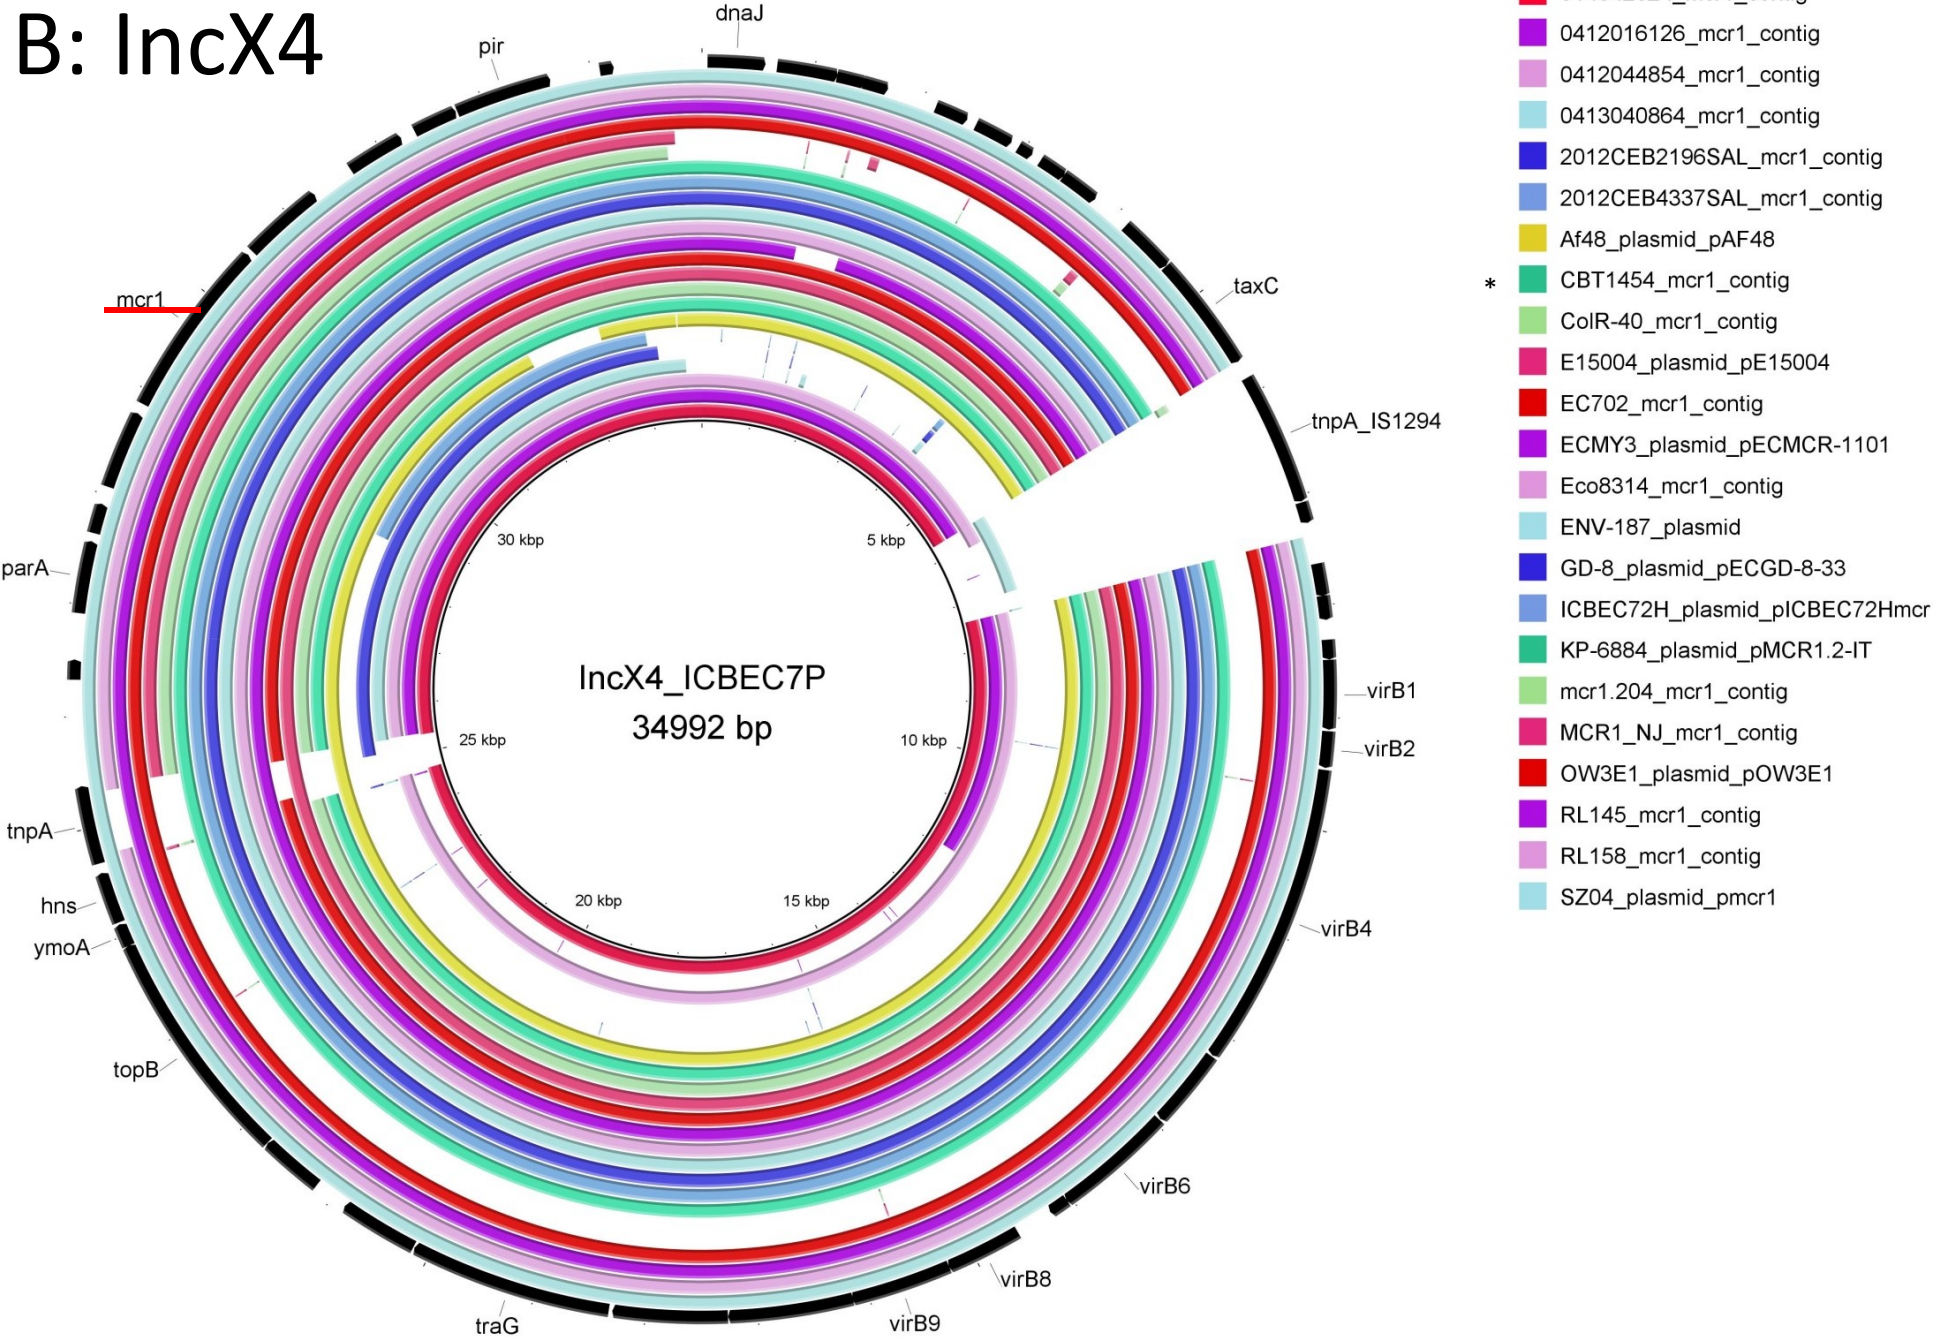

# C: IncHI2

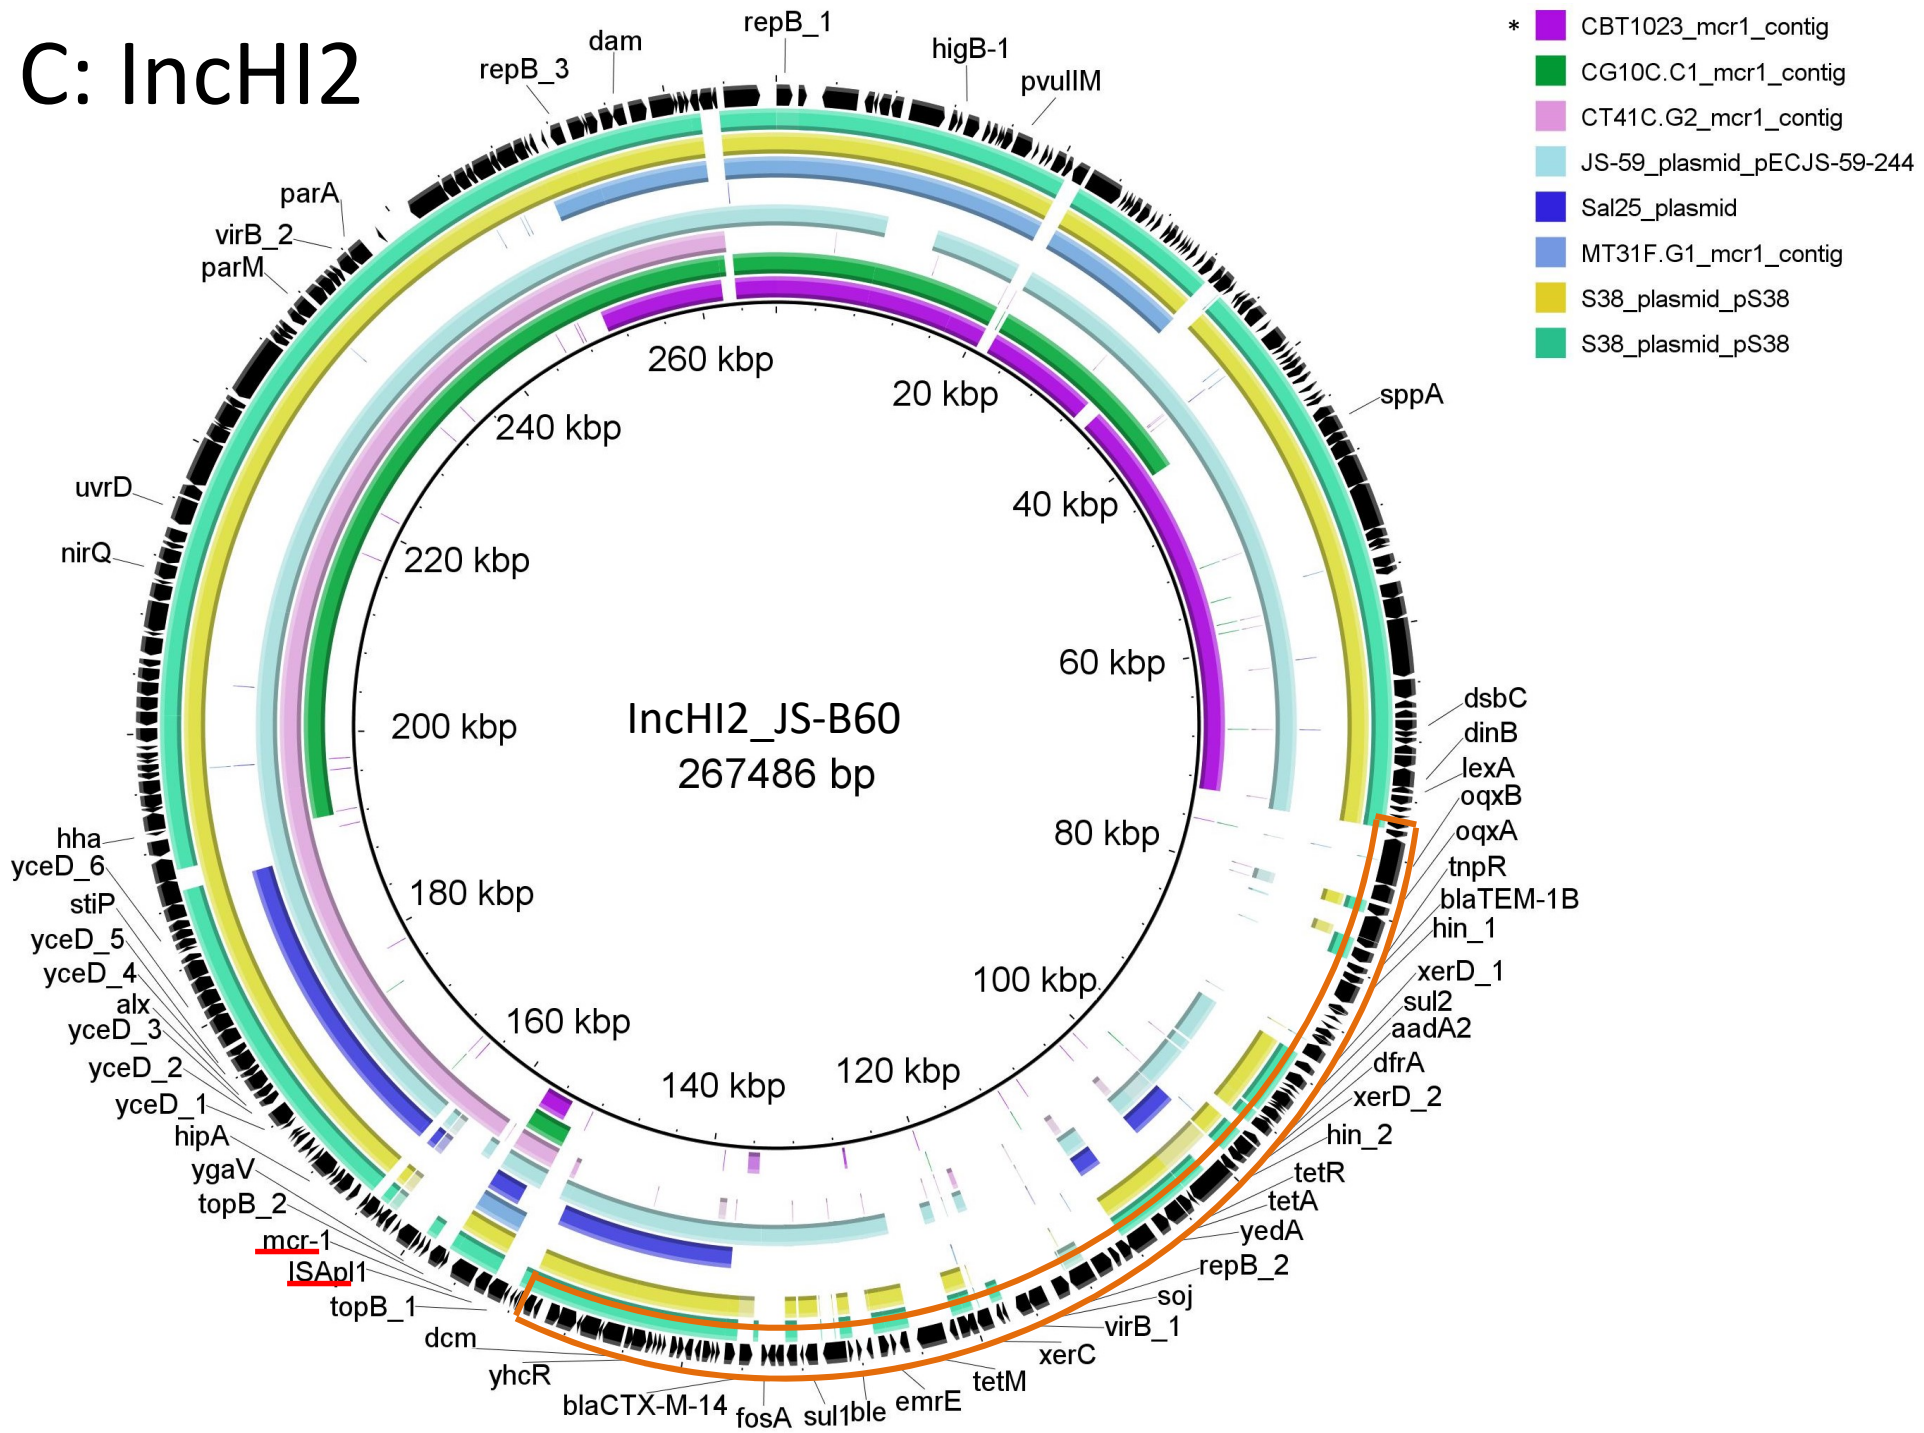



**Figure 3:** Alignment of *mcr-1*-containing plasmids and contigs.

Panel A: IncI2 plasmids (n = 29); panel B: IncX4 (n = 24); panel C: IncHI2 (n = 9).

Black outer ring: plasmid used as reference for the alignment; name and size of the reference indicated in the middle of each panel. Plasmid names followed by the mention “\_mcr1\_contig” refer to assembled contigs from whole genome sequences. Other names refer to plasmid sequences deposited in online databases. The *mcr-1* gene and ISA-pl1 location are underlined in red.

Plasmids indicated with an asterisk are from the isolates newly sequenced for this study.

Panel C: Putative MDR cassette is highlighted in orange.
